# Supplementary material
Source: PubMed Central journal article supplement (PMC3903199)
Supplement: 1313933111_pnas.201313933SI.pdf [file 1313933111_pnas.201313933SI.pdf]

# Supporting Information

Iwasaki et al. 10.1073/pnas.1313933111

## Integrated Model for Leech Swimming

The integrated model developed and used in this article is summarized below. All of the model parameter values and their definitions are summarized in Table S1.

**Central Pattern Generator.** The central pattern generator (CPG) model used in this study is a modified version of the one reported in ref. 1:

$$v_i = M F(s)\varphi(v_i) + by_i + \sum_{j=1}^z \epsilon D e^{-j\tau_d s} \varphi(v_{i-j}) + \sum_{j=1}^z \epsilon A e^{-j\tau_d s} \varphi(v_{i+j})$$

for  $i = 1, \dots, k$ , where  $s$  is the Laplace variable (or the time derivative operator),  $k = 17$  is the number of segmental ganglia (M2–M18 that are active during swimming),  $z = 5$  is the intersegmental coupling span,  $v_i(t) \in \mathbb{R}^3$  is the membrane potential vector for the  $i^{\text{th}}$  segment (define  $v_i = 0$  for  $i < 1$  and  $i > k$  for notational convenience),  $y_i(t) \in \mathbb{R}$  is the sensory feedback input (proportional to muscle tension), and

$$F(s) := \frac{\mu_\gamma}{1 + \tau_\gamma s}, \varphi(v_i) := \sigma \tanh(v_i/\sigma), \mu_\gamma := (1 - \gamma)\mu, \tau_\gamma := (1 - \gamma)\tau,$$

$$M = \begin{bmatrix} 0 & -1 & 0 \\ 0 & 0 & -1 \\ -1 & 0 & 0 \end{bmatrix}, D = \begin{bmatrix} 2 & 0 & 0 \\ 0 & 0 & 0 \\ 0 & 0 & 0 \end{bmatrix},$$

$$A = \begin{bmatrix} 0 & -1 & 0 \\ 0 & 0 & -1 \\ 0 & 0 & 0 \end{bmatrix}, b = \begin{bmatrix} 0 \\ 0 \\ 1 \end{bmatrix}.$$

The parameter  $\gamma$  is the excitatory input level from the gating neurons and was set equal to  $-0.4$  for fictive swimming,  $0.1$  for the high-viscosity case, or  $0.4$  otherwise. Negative values of  $\gamma$  indicate that the excitation level is lower and the synaptic time constant  $\tau_\gamma$  is larger than the nominal values.

**Motoneuron.** The motoneuron (MN) impulse frequency  $f_i$  of the  $i^{\text{th}}$  segment is determined by the membrane potential of the  $0^\circ$ -phase neuron  $\chi_i(t)$ , which is the first entry of the vector  $v_i(t) \in \mathbb{R}^3$ . The impulse adaptation dynamics are modeled as (2)

$$f_i = H(s)\chi_i, H(s) = \alpha_o \left( 1 - \frac{\beta_o}{1 + \tau_o s} \right).$$

The supralinear summation effects of three MNs identified in leeches are modeled by  $f_i = \delta f_i$  with  $\delta = 3 \times 1.5 = 4.5$ , which is used as the muscle activation input.

**Muscle.** The tension on the dorsal side of the  $i^{\text{th}}$  segment of the leech body is modeled as (3)

$$T_{d_i} = \kappa(x_{d_i})(P(s)f_{d_i} + 1) + c\dot{x}_{d_i}, \kappa(x_{d_i}) := \mu_m e^{x_{d_i}/\eta}, P(s) := \frac{\alpha e^{-s\tau_a}}{1 + \tau_c s},$$

where  $x_{d_i}$  is the strain,  $T_{d_i}$  is the tension, and  $f_{d_i}$  is the MN impulse frequency. An identical relationship holds for the strain, tension and MN impulse frequency on the ventral side. We assume symmetry during swimming

$$f_{d_i}(t) = f_b + \tilde{f}_i(t), \quad x_{d_i}(t) = x_i(t),$$

$$f_{v_i}(t) = f_b - \tilde{f}_i(t), \quad x_{v_i}(t) = -x_i(t)$$

for the dorsal and ventral sides, where the signs of  $\tilde{f}_i(t)$  are set so that an increase in the model MN frequency increases (respective to decreases) the stiffness of dorsal (respective to ventral) muscles, based on the experimentally identified excitatory/inhibitory MN connections (4). Then we have the muscle bending moment  $u_i(t)$  given by

$$u_i = r(T_{v_i} - T_{d_i}) = -r\mu_m a(x_i)P(s)\tilde{f}_i - r\mu_m d(x_i)(1 + \alpha f_b) - 2rc\dot{x}_i,$$

$$a(x_i) := e^{x_i/\eta} + e^{-x_i/\eta}, d(x_i) := e^{x_i/\eta} - e^{-x_i/\eta}.$$

The nonlinear strain functions are approximated by  $a(x_i) \cong 5.7$  and  $d(x_i) \cong 106.8x_i$  in the range  $|x_i| \leq 0.08$  of normal swimming.

**Body.** The leech body is modeled by a chain of  $n = 18$  identical links, as shown in Fig. 2C. Each of the  $k = 17$  joints is considered as a segment and is actuated by the segmental CPG oscillator through the muscle bending moment  $u_i$ . The strain  $x_i$  is related to the joint angle  $\phi_i$  by  $x_i = (r/(\ell/n))\phi_i$ . The equations of motion for the link chain subject to fluid forces have been derived from the first principle of mechanics (5, 6):

$$J(\theta)\ddot{\theta} + G(\theta)\dot{\theta}^2 = Bu + \tau + L(\theta)^\top \dot{h}, \quad m\ddot{w} = E^\top \dot{h},$$

where  $h(t) \in \mathbb{R}^{2n}$  and  $\tau(t) \in \mathbb{R}^n$  are the fluid force and torque acting on the links, respectively,  $u(t) \in \mathbb{R}^k$  is the muscle bending moment on the joints,  $\theta(t) \in \mathbb{R}^k$  is the link angles with respect to the inertial frame, and  $w(t) \in \mathbb{R}^2$  is the position of the center of gravity in the plane of undulation. The first equation describes how the body shape and orientation change in response to the muscle bending moment under the influence of the fluid force. The second equation shows how the shape change influences the swim velocity.

**Fluid.** The leech body is assumed to be neutrally buoyant. Taylor's resistive force model is used for the hydrodynamic effects (5):

$$\dot{h} = \begin{bmatrix} \dot{h}_x \\ \dot{h}_y \end{bmatrix}, \begin{bmatrix} \dot{h}_{x_i} \\ \dot{h}_{y_i} \end{bmatrix} = \begin{bmatrix} \cos \theta_i & -\sin \theta_i \\ \sin \theta_i & \cos \theta_i \end{bmatrix} \begin{bmatrix} \dot{h}_{t_i} \\ \dot{h}_{n_i} \end{bmatrix},$$

$$\dot{h}_{t_i} = -2.7c_t(\ell/n)\sqrt{\rho\mu d}|v_{n_i}|v_{t_i},$$

$$\dot{h}_{n_i} = -c_p\rho d\ell/(2n)|v_{n_i}|v_{n_i},$$

$$\tau_i = -(2/3)c_p\rho d\ell/(\ell/(2n))^3|v_{n_i}|\dot{\theta}_i,$$

where  $h_{t_i}$  and  $h_{n_i}$  are the tangential and normal components of the fluid force vector acting on the  $i^{\text{th}}$  link,  $v_{t_i}$  and  $v_{n_i}$  are the tangential and normal components of the velocity vector of the center of gravity of the  $i^{\text{th}}$  link, and  $\dot{h}_x, \dot{h}_y \in \mathbb{R}^n$  are the vectors of horizontal and vertical fluid forces  $\dot{h}_{x_i}, \dot{h}_{y_i}$ .

**Stretch Receptor.** The stretch receptor measures the muscle tension and feeds this information back to the  $240^\circ$  phase group in the CPG with a negative gain (7). The sensory feedback signal at each segment is modeled by the negative of the muscle bending moment, scaled by an appropriate gain:  $y_i = -\zeta_i u_i$ . The values of the sensory gains  $\zeta_i$  was tuned through iterative simulations to reproduce intact swimming behavior in water. In particular, the magnitudes of the sensory signals  $y_i$  were estimated from the

harmonic balance analysis so that the  $180^\circ$  phase lag in the inputs  $y_i$  results in  $360^\circ$  phase lag in the outputs  $v_i$  along the CPG chain. The magnitudes of the bending moments  $u_i$  during intact swimming were estimated from the body–fluid and muscle models

using recorded kinematic motion data. The ratio of the estimated magnitudes of  $y_i$  and  $u_i$  gives an initial guess for the sensory gain  $\zeta_i$ , which was then iteratively refined through simulations of the integrated model.

1. Zheng M, Friesen WO, Iwasaki T (2007) Systems-level modeling of neuronal circuits for leech swimming. *J Comput Neurosci* 22(1):21–38.
2. Tian J, Iwasaki T, Friesen WO (2010) Analysis of impulse adaptation in motoneurons. *J Comp Physiol A Neuroethol Sens Neural Behav Physiol* 196(2):123–136.
3. Chen J, Tian J, Iwasaki T, Friesen WO (2011) Mechanisms underlying rhythmic locomotion: Dynamics of muscle activation. *J Exp Biol* 214(11):1955–1964.
4. Kristan WB, Jr., Calabrese RL, Friesen WO (2005) Neuronal control of leech behavior. *Prog Neurobiol* 76(5):279–327.
5. Chen J, Friesen WO, Iwasaki T (2011) Mechanisms underlying rhythmic locomotion: Body-fluid interaction in undulatory swimming. *J Exp Biol* 214(4):561–574.
6. Saito M, Fukaya M, Iwasaki T (2002) Serpentine locomotion with robotic snake. *IEEE Control Syst Mag N Y* 22:64–81.
7. Cang J, Yu X, Friesen WO (2001) Sensory modification of leech swimming: Interactions between ventral stretch receptors and swim-related neurons. *J Comp Physiol A Neuroethol Sens Neural Behav Physiol* 187(7):569–579.

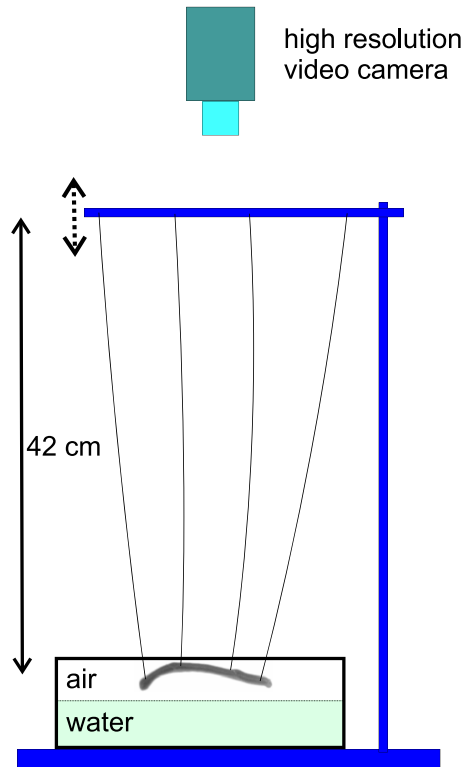

**Fig. S1.** Experimental setup of air swimming. The leech is suspended on edge by four threads so that its flattened body nominally lies within a vertical plane. The height of the thread support is adjustable and the leech body can be raised out of water while swimming.

**Table S1. Nominal parameter values of the integrated model for leech swimming**

| Parameter  | Nominal value           | Description                                                            |
|------------|-------------------------|------------------------------------------------------------------------|
| $k$        | 17                      | No. of segments in the CPG                                             |
| $\sigma$   | 20/3                    | Scaling factor for threshold nonlinearity in synaptic connections      |
| $\zeta_i$  | See legend              | Sensory feedback gain from $u_i$ (tension) to $y_i$ (input to the CPG) |
| $\tau$     | 200 ms                  | Intrasegmental synaptic time constant                                  |
| $\mu$      | 6                       | Intrasegmental coupling strength                                       |
| $\epsilon$ | 0.06                    | Intersegmental coupling strength                                       |
| $\tau_d$   | 15 ms                   | Intersegmental time delay per segment                                  |
| $\gamma$   | 0.4                     | Excitatory gating neuron input to the CPG                              |
| $z$        | 5                       | Intersegmental coupling span                                           |
| $\tau_o$   | 88 ms                   | MN adaptation time constant                                            |
| $\alpha_o$ | 6.09 Hz/mV              | MN gain from membrane potential to impulse frequency                   |
| $\beta_o$  | 0.49                    | Degree of MN adaptation                                                |
| $\delta$   | 4.5                     | Gain factor for supralinear summation of three MNs                     |
| $f_b$      | 60 Hz                   | Bias in MN impulse frequency after supralinear summation               |
| $\tau_a$   | 130 ms                  | Time delay in muscle activation                                        |
| $\tau_c$   | 230 ms                  | Time lag in muscle activation                                          |
| $\mu_m$    | 0.27 g                  | Tonus tension at swim length                                           |
| $\eta$     | 1/29                    | Strain constant in tonus tension                                       |
| $\alpha$   | 1/45 Hz <sup>-1</sup>   | Static gain from MN impulse frequency to activation                    |
| $c$        | 1 mN·s                  | Muscle damping coefficient                                             |
| $\rho$     | 1,000 kg/m <sup>3</sup> | Water density                                                          |
| $\mu$      | 0.001 kg/(m·s)          | Water viscosity                                                        |
| $c_t$      | 0.6                     | Fluid tangential drag coefficient                                      |
| $c_p$      | 3.0                     | Fluid normal drag coefficient                                          |
| $n$        | 18                      | No. of links used to represent the leech body                          |
| $m$        | 1 g                     | Leech body mass                                                        |
| $\ell$     | 100 mm                  | Leech body length                                                      |
| $d$        | 10 mm                   | Leech body width                                                       |
| $r$        | 10/6 mm                 | Half of leech body thickness                                           |

( $\zeta_1, \dots, \zeta_{17}$ ) = (9.500, 2.744, 1.013, 0.422, 0.253, 0.162, 0.108, 0.094, 0.086, 0.105, 0.086, 0.091, 0.127, 0.153, 0.374, 0.774, 2.533) mV/(mN·mm).
